# Supplementary figures and images for: ATP-Dependent Lon Protease Contributes to Helicobacter pylori-Induced Gastric Carcinogenesis
Source: PubMed Central journal article supplement — Neoplasia. 2016 Apr 20;18(4):242–52. doi: 10.1016/j.neo.2016.03.001 (PMC4840290; doi:10.1016/j.neo.2016.03.001), 2016-04-20

**Figure S1**

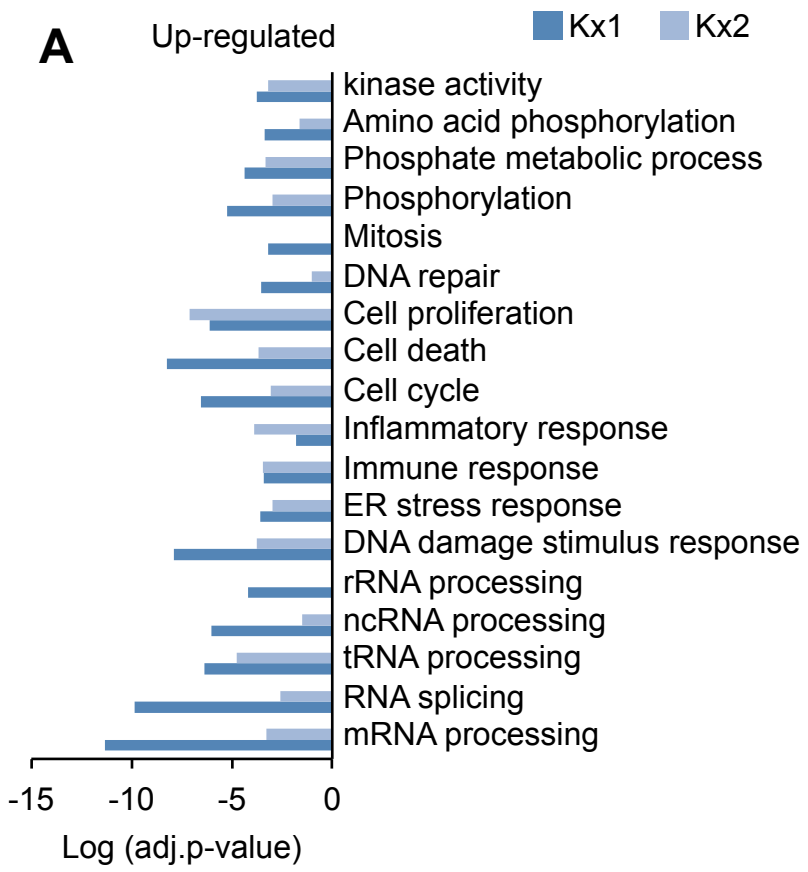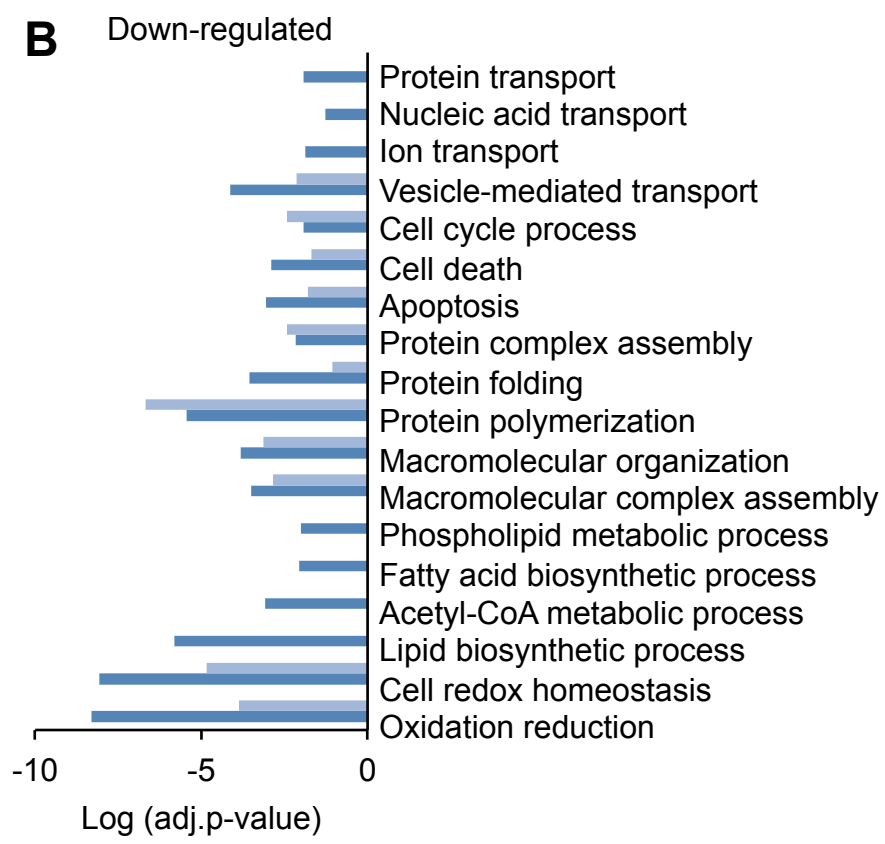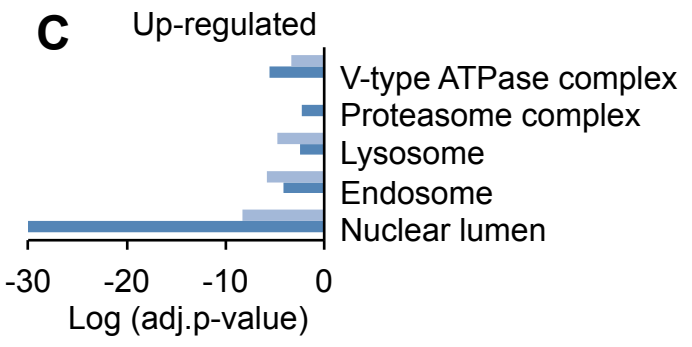

Supplement: mmc1.pdf [file mmc1.pdf]

**Figure S2**

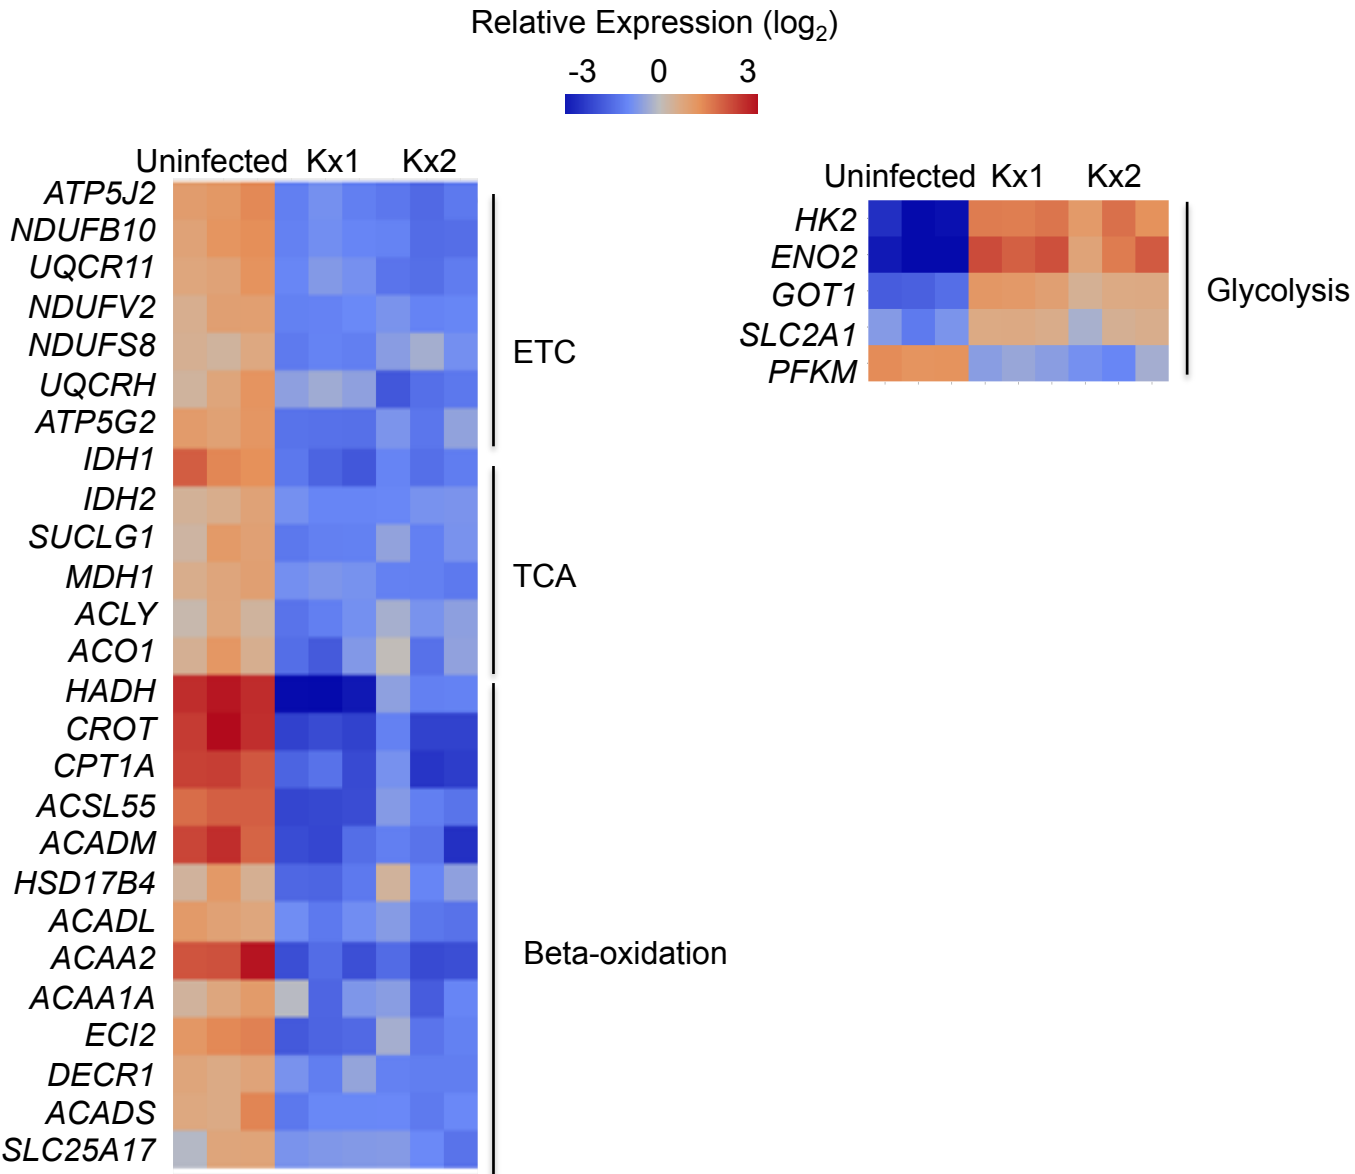

Supplement: mmc2.pdf [file mmc2.pdf]

Figure S3

A

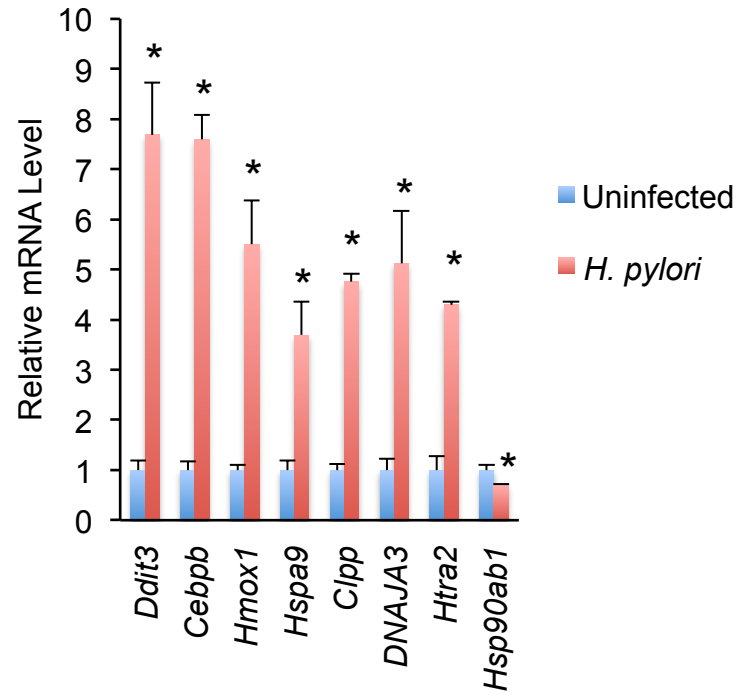

Supplement: mmc3.pdf [file mmc3.pdf]

**Figure S4**

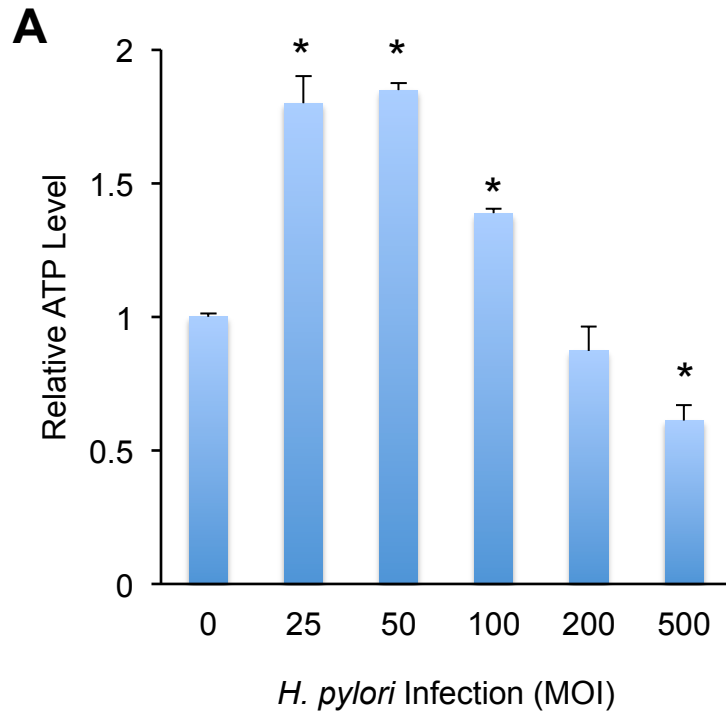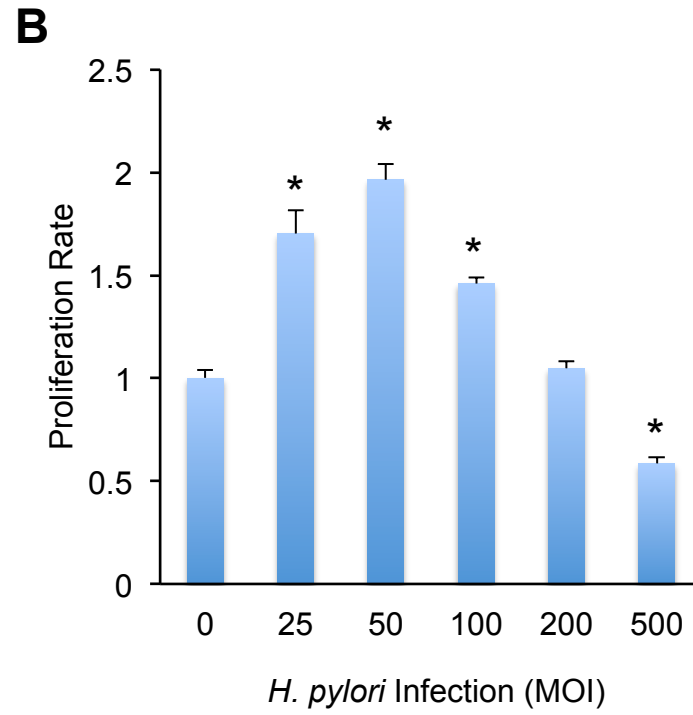

Supplement: mmc4.pdf [file mmc4.pdf]

**Figure S5**

**A**

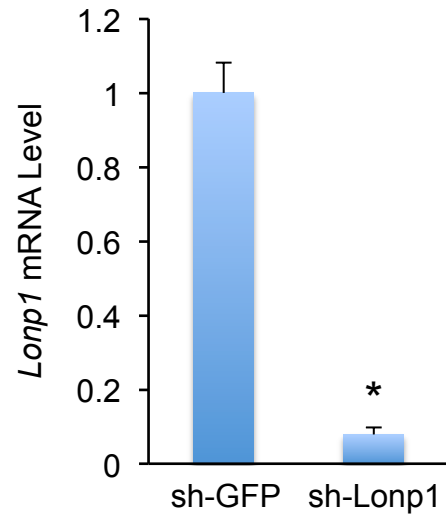

**B**

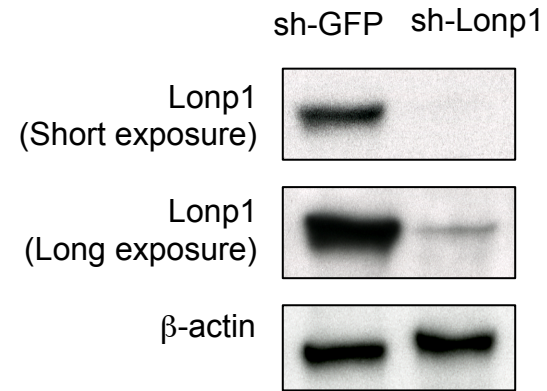

Supplement: mmc5.pdf [file mmc5.pdf]
